# Supplementary material for: Comparison of oseltamivir and α-galactosylceramide for reducing disease and transmission in pigs infected with 2009 H1N1 pandemic influenza virus
Source: PubMed Central journal article supplement (PMC9635317; doi:10.3389/fvets.2022.999507), 2022-10-20
Supplement: Data_Sheet_1.pdf [file Data_Sheet_1.pdf]

Supplementary Material

Supplementary Figure 1

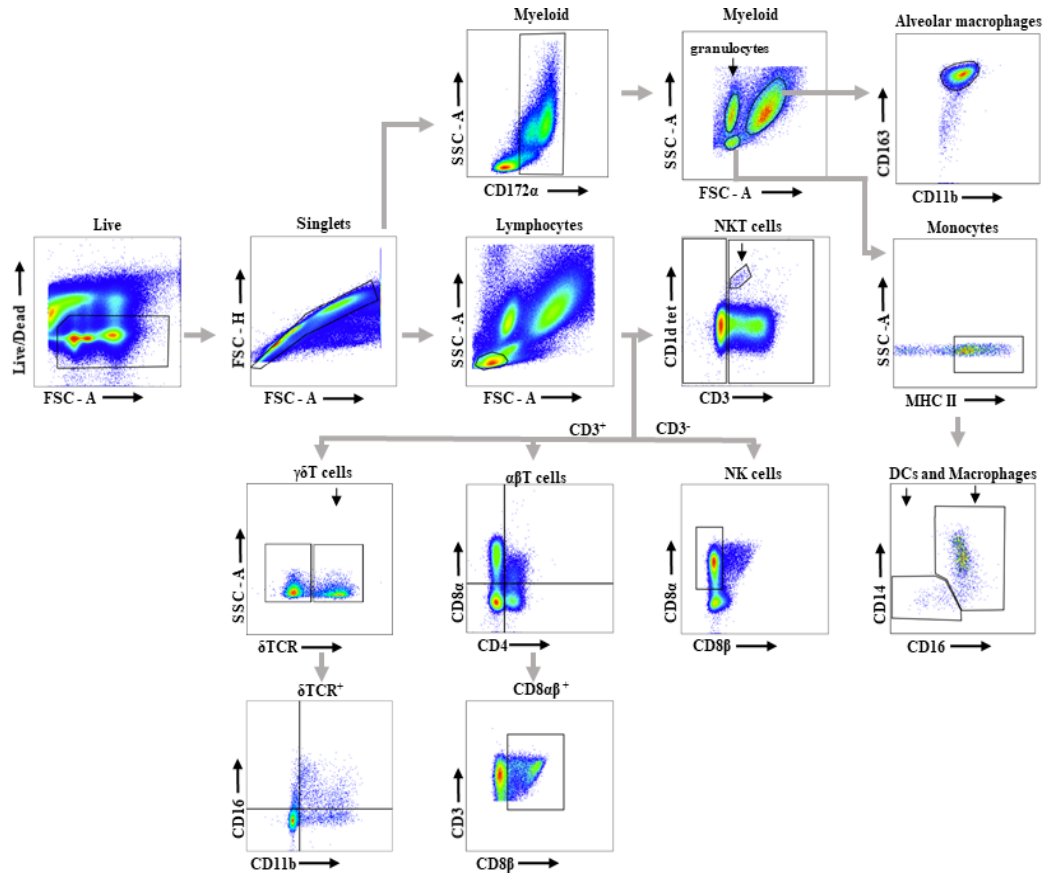

**Supplemental Figure 1. Gating strategy to distinguish immune cell populations in tissues.**  $\alpha\beta$  and  $\gamma\delta$  T cells were distinguished by sequentially gating live single lymphocytes,  $CD3^+$  cells, and then  $CD4^+$ ,  $CD8\alpha^+$ ,  $CD8\beta^+$ ,  $TCR-\delta^+$  cells. iNKT-cells were distinguished from conventional T cells according to  $CD1d$ -tetramer staining. NK cells were identified as  $CD8\alpha^+ CD3^-$  cells after first gating on single live lymphocytes. T cell and NK cell subsets were distinguished according to their surface expression of  $CD11b$  and  $CD16$ . Monocytes, macrophages, and granulocytes were identified after initially gating on live single  $CD172\alpha^+$  cells. Thereafter, monocytes were identified as  $MHCII^+ CD14^+$  cells and alveolar macrophages were identified as  $SSC^{high} CD163^+ CD11b^+$  cells. Granulocytes were identified according to FSC and SSC. FSC, forward scatter; SSC, side scatter; A, signal area; H, signal height. One representative lung sample is shown.

**Supplemental Table 1.** Reagents used for flow cytometry analysis of surface markers

| Antigen             | Clone        | Isotype              | Conjugation       | Source            |
|---------------------|--------------|----------------------|-------------------|-------------------|
| CD1d tetramer       | N/A          | N/A                  | PE                | NIH Tetramer Core |
| Live/Dead           | N/A          | N/A                  | IR                | Invitrogen        |
| Anti-CD3 $\epsilon$ | BB23-8E6-8C8 | Mouse IgG2a $\kappa$ | PE-Cy7            | BD Biosciences    |
| Anti-CD4            | 74-12-4      | Mouse IgG2b $\kappa$ | PE & Alexa647     | Southern Biotech  |
| Anti-CD8 $\alpha$   | 76-2-11      | Mouse IgG2a $\kappa$ | Alexa488 & Biotin | Southern Biotech  |
| Anti-CD8 $\beta$    | PPT23        | Mouse IgG1           | A488              | Bio-Rad           |
| Anti-TCR $\delta$   | PGBL22A      | Mouse IgG1           | Alexa647          | WSU mAB Center    |
| Anti-CD14           | MIL2         | Mouse IgG2b          | Alexa488          | Bio-Rad           |
| Anti-CD16           | G7           | Mouse IgG1           | Biotin            | BD Biosciences    |
| Anti-CD11b          | M1/70        | Rat IgG2b $\kappa$   | Alexa647          | Biolegend         |
| Anti-MHC class II   | H42A         | Mouse IgG2a $\kappa$ | Alexa647          | WSU mAb Center    |
| Anti-CD163          | 2A10/11      | Mouse IgG1           | PE                | Bio-Rad           |
| Anti-CD172 $\alpha$ | 74-22-15A    | Mouse IgG2b $\kappa$ | PerCP             | BD Biosciences    |

**Supplemental Table 2.** Flow cytometric analysis of immune cell populations in lung

|                                                                        | MM (n=6)                      | MC (n=10)                    | OS (n=8)                                    | $\alpha$ GC (n=10)                           | $\alpha$ GCOS (n=8)                          |
|------------------------------------------------------------------------|-------------------------------|------------------------------|---------------------------------------------|----------------------------------------------|----------------------------------------------|
| Lymphocytes (% of live cells)                                          | 26.6 $\pm$ 4.5 <sup>a</sup>   | 28.5 $\pm$ 3.8 <sup>a</sup>  | 29.3 $\pm$ 5.0 <sup>a</sup>                 | 26.6 $\pm$ 2.7 <sup>a</sup>                  | 25.8 $\pm$ 2.3 <sup>a</sup>                  |
| Myeloid cells (% of live cells)                                        | 70.1 $\pm$ 3.3 <sup>a</sup>   | 65.8 $\pm$ 2.9 <sup>ab</sup> | 57.1 $\pm$ 4.7 <sup>ab</sup>                | <b>63.0 <math>\pm</math> 1.7<sup>b</sup></b> | 67.5 $\pm$ 3.2 <sup>ab</sup>                 |
| iNKT-cells (% of CD3 <sup>+</sup> )                                    | 0.31 $\pm$ 0.13 <sup>ab</sup> | 0.13 $\pm$ 0.03 <sup>a</sup> | 0.08 $\pm$ 0.02 <sup>a</sup>                | 0.40 $\pm$ 0.19 <sup>ab</sup>                | 0.31 $\pm$ 0.16 <sup>a</sup>                 |
| CD8 $\alpha^+$ CD8 $\beta^+$ CD4 <sup>-</sup> (% of CD3 <sup>+</sup> ) | 16.7 $\pm$ 5.8 <sup>a</sup>   | 17.6 $\pm$ 4.7 <sup>a</sup>  | 26.4 $\pm$ 10.8 <sup>a</sup>                | 15.0 $\pm$ 3.2 <sup>a</sup>                  | 20.3 $\pm$ 6.2 <sup>a</sup>                  |
| CD8 $\alpha^-$ CD4 <sup>+</sup> (% of CD3 <sup>+</sup> )               | 8.15 $\pm$ 0.9 <sup>a</sup>   | 7.76 $\pm$ 1.0 <sup>a</sup>  | 6.09 $\pm$ 2.1 <sup>a</sup>                 | 9.39 $\pm$ 1.4 <sup>a</sup>                  | 7.69 $\pm$ 0.9 <sup>a</sup>                  |
| $\delta$ TCR <sup>+</sup> (% of CD3 <sup>+</sup> )                     | 53.0 $\pm$ 8.7 <sup>a</sup>   | 50.1 $\pm$ 7.0 <sup>a</sup>  | 48.6 $\pm$ 6.4 <sup>a</sup>                 | 48.3 $\pm$ 5.3 <sup>a</sup>                  | <b>30.1 <math>\pm</math> 3.3<sup>b</sup></b> |
| NK cells (% of live cells)                                             | 7.8 $\pm$ 1.8 <sup>a</sup>    | 7.2 $\pm$ 1.1 <sup>a</sup>   | <b>8.7 <math>\pm</math> 1.9<sup>b</sup></b> | 7.9 $\pm$ 1.2 <sup>a</sup>                   | 6.8 $\pm$ 0.9 <sup>a</sup>                   |
| Alveolar macrophages (% of live cells)                                 | 36.2 $\pm$ 2.3 <sup>a</sup>   | 38.5 $\pm$ 3.2 <sup>a</sup>  | 32.8 $\pm$ 1.9 <sup>a</sup>                 | 38.1 $\pm$ 1.4 <sup>a</sup>                  | 40.6 $\pm$ 1.7 <sup>a</sup>                  |
| Granulocytes (% of live cells)                                         | 18.6 $\pm$ 2.8 <sup>a</sup>   | 14.3 $\pm$ 1.8 <sup>a</sup>  | 20.7 $\pm$ 4.4 <sup>a</sup>                 | 16.7 $\pm$ 2.1 <sup>a</sup>                  | 19.0 $\pm$ 2.0 <sup>a</sup>                  |

Values expressed in means and  $\pm$  SEM, P<0.05 calculated using R function glm followed by Tukey's test. Values within rows with no common superscript letters differ significantly. Values with the same superscript are not statistically different. Values in bold are statistically different from non-infected controls.

**Supplemental Table 3.** Flow cytometric analysis of immune cell populations in BALF

|                                                                        | MM (n=6)                     | MC (n=10)                    | OS (n=8)                     | $\alpha$ GC (n=10)           | $\alpha$ GCOS (n=8)                          |
|------------------------------------------------------------------------|------------------------------|------------------------------|------------------------------|------------------------------|----------------------------------------------|
| Lymphocytes (% of live cells)                                          | 4.2 $\pm$ 0.9 <sup>a</sup>   | 6.3 $\pm$ 1.6 <sup>a</sup>   | 7.0 $\pm$ 1.1 <sup>a</sup>   | 6.1 $\pm$ 0.9 <sup>a</sup>   | 7.1 $\pm$ 1.5 <sup>a</sup>                   |
| Myeloid cells (% of live cells)                                        | 91.7 $\pm$ 0.8 <sup>a</sup>  | 88.7 $\pm$ 1.5 <sup>a</sup>  | 88.9 $\pm$ 1.7 <sup>a</sup>  | 89.2 $\pm$ 1.2 <sup>a</sup>  | 90.2 $\pm$ 1.7 <sup>a</sup>                  |
| iNKT-cells (% of CD3 <sup>+</sup> )                                    | 0.57 $\pm$ 0.26 <sup>a</sup> | 0.37 $\pm$ 0.12 <sup>a</sup> | 0.13 $\pm$ 0.05 <sup>a</sup> | 0.36 $\pm$ 0.12 <sup>a</sup> | 0.57 $\pm$ 0.25 <sup>a</sup>                 |
| CD8 $\alpha^+$ CD8 $\beta^+$ CD4 <sup>-</sup> (% of CD3 <sup>+</sup> ) | 14.2 $\pm$ 3.3 <sup>ab</sup> | 14.6 $\pm$ 2.6 <sup>a</sup>  | 14.4 $\pm$ 2.6 <sup>ab</sup> | 20.5 $\pm$ 4.9 <sup>ab</sup> | <b>19.5 <math>\pm</math> 3.5<sup>b</sup></b> |
| CD8 $\alpha^-$ CD4 <sup>+</sup> (% of CD3 <sup>+</sup> )               | 4.7 $\pm$ 1.5 <sup>a</sup>   | 7.9 $\pm$ 2.0 <sup>a</sup>   | 3.7 $\pm$ 1.2 <sup>a</sup>   | 7.9 $\pm$ 1.7 <sup>a</sup>   | 5.8 $\pm$ 2.0 <sup>a</sup>                   |
| $\delta$ TCR <sup>+</sup> (% of CD3 <sup>+</sup> )                     | 40.8 $\pm$ 3.4 <sup>a</sup>  | 37.5 $\pm$ 4.0 <sup>a</sup>  | 38.6 $\pm$ 4.3 <sup>a</sup>  | 44.0 $\pm$ 5.7 <sup>a</sup>  | 34.4 $\pm$ 3.3 <sup>a</sup>                  |
| NK cells (% of live cells)                                             | 5.0 $\pm$ 1.7 <sup>a</sup>   | 3.9 $\pm$ 0.7 <sup>a</sup>   | 4.4 $\pm$ 1.1 <sup>a</sup>   | 5.3 $\pm$ 1.3 <sup>a</sup>   | <b>8.0 <math>\pm</math> 1.9<sup>b</sup></b>  |
| Alveolar macrophages (% of live cells)                                 | 60.9 $\pm$ 4.4 <sup>a</sup>  | 65.8 $\pm$ 5.8 <sup>a</sup>  | 64.4 $\pm$ 2.4 <sup>a</sup>  | 66.7 $\pm$ 2.4 <sup>a</sup>  | 62.8 $\pm$ 3.7 <sup>a</sup>                  |
| Granulocytes (% of live cells)                                         | 15.9 $\pm$ 3.3 <sup>a</sup>  | 11.2 $\pm$ 3.1 <sup>a</sup>  | 10.4 $\pm$ 1.6 <sup>a</sup>  | 11.1 $\pm$ 1.2 <sup>a</sup>  | 12.7 $\pm$ 1.8 <sup>a</sup>                  |

Values expressed in means and  $\pm$  SEM, P<0.05 calculated using R function glm followed by Tukey's test. Values within rows with no common superscript letters differ significantly. Values with the same superscript are not statistically different. Values in bold are statistically different from non-infected controls.

**Supplemental Table 4.** Flow cytometric analysis of immune cell populations in spleen

|                                                                        | MM (n=6)                     | MC (n=10)                    | OS (n=8)                     | $\alpha$ GC (n=10)           | $\alpha$ GCOS (n=8)                          |
|------------------------------------------------------------------------|------------------------------|------------------------------|------------------------------|------------------------------|----------------------------------------------|
| Lymphocytes (% of live cells)                                          | 65.9 $\pm$ 3.6 <sup>a</sup>  | 63.9 $\pm$ 1.2 <sup>a</sup>  | 60.2 $\pm$ 1.5 <sup>a</sup>  | 61.5 $\pm$ 1.7 <sup>a</sup>  | 59.7 $\pm$ 1.5 <sup>a</sup>                  |
| Myeloid cells (% of live cells)                                        | 25.5 $\pm$ 2.5 <sup>a</sup>  | 22.0 $\pm$ 1.6 <sup>a</sup>  | 27.7 $\pm$ 1.6 <sup>a</sup>  | 25.0 $\pm$ 1.8 <sup>a</sup>  | 26.7 $\pm$ 2.7 <sup>a</sup>                  |
| iNKT-cells (% of CD3 <sup>+</sup> )                                    | 0.06 $\pm$ 0.03 <sup>a</sup> | 0.08 $\pm$ 0.01 <sup>a</sup> | 0.10 $\pm$ 0.02 <sup>a</sup> | 0.36 $\pm$ 0.23 <sup>a</sup> | 0.29 $\pm$ 0.21 <sup>a</sup>                 |
| CD8 $\alpha^+$ CD8 $\beta^+$ CD4 <sup>-</sup> (% of CD3 <sup>+</sup> ) | 6.8 $\pm$ 0.7 <sup>a</sup>   | 7.7 $\pm$ 0.8 <sup>a</sup>   | 10.8 $\pm$ 1.4 <sup>a</sup>  | 7.6 $\pm$ 0.8 <sup>a</sup>   | <b>12.5 <math>\pm</math> 4.0<sup>b</sup></b> |
| CD8 $\alpha^-$ CD4 <sup>+</sup> (% of CD3 <sup>+</sup> )               | 22.3 $\pm$ 1.2 <sup>a</sup>  | 19.5 $\pm$ 1.4 <sup>a</sup>  | 21.2 $\pm$ 2.0 <sup>a</sup>  | 17.30 $\pm$ 2.3 <sup>a</sup> | 14.0 $\pm$ 2.2 <sup>b</sup>                  |
| $\delta$ TCR <sup>+</sup> (% of CD3 <sup>+</sup> )                     | 38.0 $\pm$ 3.9 <sup>a</sup>  | 34.5 $\pm$ 2.2 <sup>a</sup>  | 35.2 $\pm$ 3.9 <sup>a</sup>  | 30.8 $\pm$ 2.1 <sup>a</sup>  | 28.1 $\pm$ 2.9 <sup>a</sup>                  |
| NK cells (% of live cells)                                             | 3.7 $\pm$ 0.6 <sup>a</sup>   | 4.3 $\pm$ 1.0 <sup>a</sup>   | 4.9 $\pm$ 2.0 <sup>ab</sup>  | 3.7 $\pm$ 1.0 <sup>a</sup>   | <b>5.9 <math>\pm</math> 2.5<sup>b</sup></b>  |
| Granulocytes (% of live cells)                                         | 10.2 $\pm$ 1.0 <sup>a</sup>  | 7.5 $\pm$ 0.9 <sup>a</sup>   | 9.4 $\pm$ 1.7 <sup>a</sup>   | 9.1 $\pm$ 0.9 <sup>a</sup>   | 10.2 $\pm$ 1.5 <sup>a</sup>                  |
| Macrophages (% of live cells)                                          | 3.3 $\pm$ 0.6 <sup>a</sup>   | 2.7 $\pm$ 0.3 <sup>a</sup>   | 2.6 $\pm$ 0.3 <sup>a</sup>   | 2.0 $\pm$ 0.2 <sup>a</sup>   | 3.1 $\pm$ 0.6 <sup>a</sup>                   |
| Dendritic cells (% of live cells)                                      | 1.3 $\pm$ 0.2 <sup>a</sup>   | 1.9 $\pm$ 0.6 <sup>a</sup>   | 2.1 $\pm$ 0.7 <sup>a</sup>   | 2.0 $\pm$ 0.5 <sup>a</sup>   | 1.1 $\pm$ 0.4 <sup>a</sup>                   |

Values expressed in means and  $\pm$  SEM, P<0.05 calculated using R function glm followed by Tukey's test. Values within rows with no common superscript letters differ significantly. Values with the same superscript are not statistically different. Values in bold are statistically different from non-infected controls.

**Supplemental Table 5.** List of 84 transcripts queried through Pig Inflammatory Cytokines and Receptors PCR arrays in lung samples

| Gene             | Normalized to MM |               | Normalized to MC |              |             |              |             |              |
|------------------|------------------|---------------|------------------|--------------|-------------|--------------|-------------|--------------|
|                  | MC               |               | OS               |              | αGC         |              | αGCOS       |              |
|                  | Fold change      | P value       | Fold change      | P value      | Fold change | P value      | Fold change | P value      |
| <i>AIMP1</i>     | -1.16            | 0.4503        | 1.09             | 0.590        | 1.05        | 0.714        | 1.09        | 0.641        |
| <i>BMP2</i>      | 1.04             | 0.7640        | 1.32             | 0.261        | 1.09        | 0.357        | 1.49        | 0.087        |
| <i>C5</i>        | -1.27            | 0.7127        | 1.25             | 0.674        | 1.21        | 0.648        | 1.19        | 0.721        |
| <i>CCL1</i>      | 1.62             | <b>0.0057</b> | 1.20             | 0.361        | -1.08       | 0.911        | 1.88        | 0.086        |
| <i>CCL17</i>     | 1.53             | <b>0.0129</b> | 1.42             | 0.282        | -1.01       | 0.893        | 1.90        | 0.094        |
| <i>CCL2</i>      | 1.75             | 0.3182        | -1.63            | 0.411        | -1.93       | 0.128        | -1.49       | 0.319        |
| <i>CCL20</i>     | 2.43             | <b>0.0007</b> | 1.17             | 0.305        | 2.27        | <b>0.011</b> | -1.39       | 0.386        |
| <i>CCL21</i>     | 1.28             | 0.1543        | 1.29             | 0.334        | -1.32       | 0.130        | -1.28       | 0.104        |
| <i>CCL22</i>     | 1.16             | 0.5154        | -1.38            | 0.455        | -1.04       | 0.877        | 1.90        | 0.094        |
| <i>CCL3L1</i>    | 1.16             | 0.7266        | -1.42            | 0.172        | -1.07       | 0.454        | 1.20        | 0.214        |
| <i>CCL4</i>      | 1.10             | 0.7576        | -1.06            | 0.776        | -1.16       | 0.421        | 1.38        | 0.178        |
| <i>CCL5</i>      | 1.45             | <b>0.0270</b> | 1.78             | 0.143        | 1.01        | 0.724        | 2.23        | <b>0.005</b> |
| <i>CCL8</i>      | 1.24             | 0.4638        | 1.01             | 0.952        | -1.37       | 0.238        | 1.11        | 0.949        |
| <i>CCR1</i>      | 1.23             | 0.2664        | 1.37             | 0.292        | -1.03       | 0.848        | 1.63        | 0.106        |
| <i>CCR10</i>     | 1.12             | 0.5358        | 1.21             | 0.363        | 1.03        | 0.684        | 1.92        | 0.081        |
| <i>CCR2</i>      | 1.45             | 0.0738        | 1.06             | 0.734        | -1.17       | 0.149        | 1.04        | 0.901        |
| <i>CCR3</i>      | 1.22             | 0.2986        | 1.63             | 0.217        | -1.09       | 0.289        | 2.28        | <b>0.029</b> |
| <i>CCR4</i>      | 1.32             | <b>0.0177</b> | 1.36             | 0.262        | -1.12       | 0.278        | 1.40        | 0.179        |
| <i>CCR5</i>      | 1.63             | 0.1202        | 1.12             | 0.783        | -1.14       | 0.464        | 1.27        | 0.393        |
| <i>CCR7</i>      | 1.21             | 0.2722        | -1.10            | 0.534        | -1.01       | 0.877        | 1.46        | 0.137        |
| <i>CD40LG</i>    | 1.28             | 0.2005        | 1.43             | 0.135        | -1.19       | 0.265        | 1.19        | 0.371        |
| <i>CD70</i>      | 1.51             | <b>0.0382</b> | 1.24             | 0.279        | 1.02        | 0.981        | 1.35        | 0.156        |
| <i>CSF1</i>      | 1.09             | 0.4686        | 1.02             | 0.810        | -1.19       | 0.344        | 1.15        | 0.244        |
| <i>CSF2</i>      | -1.09            | 0.9730        | 1.08             | 0.979        | 1.16        | 0.674        | 1.28        | 0.512        |
| <i>CSF3</i>      | 1.18             | 0.3153        | 1.35             | 0.301        | 1.03        | 0.660        | 1.83        | 0.084        |
| <i>CXCL10</i>    | 4.00             | 0.4869        | -1.39            | 0.492        | -1.67       | 0.351        | -1.06       | 0.499        |
| <i>CXCL11</i>    | 1.85             | 0.3866        | 1.26             | 0.597        | -1.37       | 0.355        | 1.53        | 0.524        |
| <i>CXCL12</i>    | 1.17             | 0.3228        | -1.18            | 0.432        | -1.14       | 0.303        | -1.21       | 0.196        |
| <i>LOC396594</i> | 1.24             | 0.2751        | -1.08            | 0.833        | 1.70        | <b>0.030</b> | -1.32       | 0.079        |
| <i>CXCL9</i>     | 3.10             | 0.3803        | 1.00             | 0.813        | -1.80       | 0.339        | 1.48        | 0.956        |
| <i>CXCR2</i>     | -1.34            | 0.0713        | 1.34             | <b>0.048</b> | 1.24        | 0.060        | 1.40        | 0.088        |
| <i>CXCR4</i>     | -1.49            | <b>0.0267</b> | 1.13             | 0.465        | 1.08        | 0.598        | 1.32        | 0.076        |
| <i>FASLG</i>     | 1.36             | <b>0.0436</b> | 1.39             | 0.221        | 1.03        | 0.775        | 1.73        | <b>0.033</b> |
| <i>FLT3LG</i>    | 1.12             | 0.4384        | 1.14             | 0.400        | -1.00       | 0.947        | 1.68        | 0.106        |
| <i>IFNG</i>      | 1.82             | 0.1129        | 1.08             | 0.727        | -1.26       | 0.284        | 1.36        | 0.295        |

**Cont. Supplemental Table 5.** List of 84 transcripts queried through Pig Inflammatory Cytokines and Receptors PCR arrays in lung samples

| Gene           | Normalized to MM |               | Normalized to MC |         |             |         |               |              |
|----------------|------------------|---------------|------------------|---------|-------------|---------|---------------|--------------|
|                | MC               |               | OS               |         | $\alpha$ GC |         | $\alpha$ GCOS |              |
|                | Fold change      | P value       | Fold change      | P value | Fold change | P value | Fold change   | P value      |
| <i>IL10</i>    | 1.03             | 0.8229        | -1.1             | 0.578   | -1.04       | 0.710   | 1.06          | 0.885        |
| <i>IL10RA</i>  | 1.26             | 0.0826        | 1.31             | 0.315   | -1.04       | 0.795   | 1.65          | 0.097        |
| <i>IL10RB</i>  | 1.06             | 0.5386        | 1.19             | 0.206   | 1.03        | 0.697   | 1.14          | 0.287        |
| <i>IL12B</i>   | 1.29             | 0.1875        | -1.50            | 0.434   | 1.06        | 0.549   | 2.06          | 0.074        |
| <i>IL13</i>    | 1.52             | 0.4106        | 1.62             | 0.287   | -1.22       | 0.378   | 1.44          | 0.298        |
| <i>IL15</i>    | 1.24             | 0.1116        | 1.13             | 0.435   | 1.10        | 0.359   | 1.35          | 0.087        |
| <i>IL16</i>    | 1.25             | <b>0.0056</b> | 1.25             | 0.288   | 1.02        | 0.686   | 1.36          | 0.112        |
| <i>IL17A</i>   | -1.05            | 0.9814        | 1.51             | 0.310   | 1.09        | 0.967   | 2.63          | <b>0.045</b> |
| <i>IL17F</i>   | 1.03             | 0.8871        | 1.58             | 0.256   | 1.19        | 0.257   | 1.98          | 0.080        |
| <i>IL18</i>    | -1.15            | 0.2879        | 1.23             | 0.096   | -1.11       | 0.334   | 1.15          | 0.276        |
| <i>IL18RI</i>  | 1.28             | 0.1945        | 1.05             | 0.623   | -1.02       | 0.935   | -1.09         | 0.322        |
| <i>IL1A</i>    | 1.08             | 0.6679        | -1.61            | 0.084   | -1.13       | 0.336   | -1.21         | 0.321        |
| <i>IL1B</i>    | 1.12             | 0.5335        | 1.39             | 0.301   | 1.01        | 0.912   | 2.14          | 0.097        |
| <i>IL1RN</i>   | 1.15             | 0.6687        | 1.10             | 0.732   | -1.23       | 0.316   | 1.31          | 0.538        |
| <i>IL21</i>    | 1.45             | 0.3383        | 1.57             | 0.262   | -1.18       | 0.427   | 2.17          | 0.063        |
| <i>IL23A</i>   | 1.12             | 0.5668        | 1.56             | 0.248   | -1.05       | 0.750   | 1.85          | 0.070        |
| <i>IL27</i>    | -1.00            | 0.7592        | 1.63             | 0.271   | 1.21        | 0.614   | 2.37          | 0.078        |
| <i>IL2RG</i>   | 1.23             | <b>0.0091</b> | 1.45             | 0.247   | -1.02       | 0.642   | 1.28          | 0.067        |
| <i>IL4</i>     | 1.29             | 0.0579        | -1.13            | 0.441   | 1.04        | 0.660   | 1.74          | 0.093        |
| <i>IL4R</i>    | 1.33             | 0.0851        | 1.20             | 0.329   | -1.07       | 0.581   | 1.37          | 0.090        |
| <i>IL5</i>     | 1.17             | 0.2299        | 1.27             | 0.323   | -1.03       | 0.741   | 1.53          | 0.128        |
| <i>IL5RA</i>   | 1.30             | <b>0.0147</b> | 1.02             | 0.584   | 1.05        | 0.476   | 1.05          | 0.441        |
| <i>IL6</i>     | 1.41             | 0.3889        | 1.24             | 0.426   | -1.04       | 0.643   | 1.47          | 0.311        |
| <i>IL6R</i>    | 1.05             | 0.5318        | -1.04            | 0.831   | -1.01       | 0.983   | 1.11          | 0.240        |
| <i>IL6ST</i>   | 1.03             | 0.7342        | 1.05             | 0.667   | 1.05        | 0.624   | -1.03         | 0.699        |
| <i>IL7</i>     | 1.11             | 0.2073        | 1.06             | 0.580   | -1.00       | 0.981   | 1.09          | 0.389        |
| <i>IL7R</i>    | 1.21             | 0.4104        | 1.13             | 0.642   | 1.01        | 0.993   | -1.12         | 0.711        |
| <i>CXCL8</i>   | 1.16             | 0.4022        | 1.36             | 0.291   | 1.23        | 0.104   | 1.54          | 0.140        |
| <i>IL9</i>     | 1.24             | 0.4571        | 1.39             | 0.303   | -1.06       | 0.583   | 2.05          | 0.091        |
| <i>LIF</i>     | 1.58             | 0.1535        | -1.07            | 0.747   | -1.16       | 0.651   | 1.28          | 0.339        |
| <i>OSM</i>     | 1.09             | 0.5958        | 1.54             | 0.248   | 1.07        | 0.452   | 2.01          | 0.069        |
| <i>IL17B</i>   | 1.47             | 0.0768        | 1.38             | 0.276   | -1.13       | 0.855   | 1.68          | 0.107        |
| <i>IL33</i>    | -1.04            | 0.9174        | -1.05            | 0.891   | -1.03       | 0.929   | -1.09         | 0.528        |
| <i>TNFSF14</i> | 1.28             | 0.2285        | 1.61             | 0.222   | -1.06       | 0.940   | 1.83          | 0.123        |
| <i>IL9R</i>    | 1.24             | 0.2142        | 1.29             | 0.323   | 1.04        | 0.712   | 1.62          | 0.131        |

**Cont. Supplemental Table 5.** List of 84 transcripts queried through Pig Inflammatory Cytokines and Receptors PCR arrays in lung samples

| Gene                | Normalized to MM |               | Normalized to MC |         |             |         |               |              |
|---------------------|------------------|---------------|------------------|---------|-------------|---------|---------------|--------------|
|                     | MC               |               | OS               |         | $\alpha$ GC |         | $\alpha$ GCOS |              |
|                     | Fold change      | P value       | Fold change      | P value | Fold change | P value | Fold change   | P value      |
| <i>LOC100621682</i> | 1.14             | 0.5615        | 1.41             | 0.290   | -1.04       | 0.870   | 2.05          | 0.097        |
| <i>IL2RB</i>        | 1.3              | <b>0.0443</b> | 1.68             | 0.156   | 1.16        | 0.124   | 1.88          | <b>0.042</b> |
| <i>LTA</i>          | 1.44             | 0.1861        | 1.30             | 0.326   | -1.04       | 0.886   | 1.83          | 0.126        |
| <i>LTB</i>          | 1.15             | 0.2934        | 1.28             | 0.322   | -1.09       | 0.701   | 1.20          | 0.323        |
| <i>MIF</i>          | -1.09            | 0.2081        | 1.09             | 0.365   | -1.10       | 0.096   | -1.04         | 0.559        |
| <i>NAMPT</i>        | -1.00            | 0.9252        | 1.08             | 0.698   | 1.07        | 0.634   | -1.14         | 0.380        |
| <i>SPP1</i>         | 1.41             | 0.5498        | -1.09            | 0.892   | -1.76       | 0.160   | -1.16         | 0.497        |
| <i>TGFB2</i>        | -1.06            | 0.3733        | -1.08            | 0.344   | -1.11       | 0.326   | -1.09         | 0.178        |
| <i>TNF</i>          | 1.34             | 0.1863        | -1.29            | 0.399   | -1.34       | 0.336   | -1.13         | 0.778        |
| <i>TNFRSF11B</i>    | -1.05            | 0.7505        | 1.01             | 0.892   | -1.02       | 0.943   | -1.07         | 0.576        |
| <i>TNFSF10</i>      | 1.36             | 0.3374        | -1.37            | 0.344   | -1.06       | 0.569   | -1.01         | 0.762        |
| <i>TNFSF13B</i>     | 1.19             | 0.0975        | 1.08             | 0.419   | 1.01        | 0.890   | 1.09          | 0.391        |
| <i>TNFSF4</i>       | 1.21             | 0.4030        | 1.55             | 0.258   | 1.15        | 0.250   | 1.75          | 0.116        |
